# Supplementary material for: Audio, video, chat, email, or survey: How much does online interview mode matter?
Source: PLOS journal article supplement (doi:10.1371/journal.pone.0263876), 2022-02-22
Supplement: S5 (10.1371/journal.pone.0263876.s005) [file journal.pone.0263876.s005]

# Interviewer follow-up survey

---

## Logistics

As a reminder: Aside from completion, your answers will not affect your compensation.

---

1) Please provide the Prolific ID number for the corresponding interview.

---

2) Interviewer Number

- ☐ 1 (1)
  - ☐ 2 (2)
  - ☐ 3 (3)
  - ☐ Pilot/other (4)
- 

3) Did this interviewee attend the interview?

- ☐ Yes. (1)
  - ☐ Was late. (2)
  - ☐ Cancelled at least 24 hours in advance. (3)
  - ☐ Cancelled less than 24 hours in advance. (4)
  - ☐ Was a no-show. (5)
-

4) How long did the interview take to complete? (Your answer will not affect your compensation.)

---

---

### Technical Difficulties

5) Were any of the following technical difficulties encountered during the interview?

- ☐ Interviewee had difficulties joining the interview (1)
  - ☐ Interviewee had difficulties using the interview platform (2)
  - ☐ Poor audio quality (3)
  - ☐ Poor video quality (4)
  - ☐ Dropped connection (5)
  - ☐ Other - please specify: (6) \_\_\_\_\_
- 

6) How much did the technical difficulties affect the conduct of the interview?

- ☐ A great deal (1)
- ☐ A lot (2)
- ☐ A moderate amount (3)
- ☐ A little (4)
- ☐ Not at all (5)

---

## Rapport & Trust

7) How often did the respondent seem ill at ease?

- ☐ During all or most of the interview (1)
  - ☐ At a number of points during the interview (2)
  - ☐ At one or two points during the interview (3)
  - ☐ Never (4)
- 

8) How often did you feel ill at ease during the interview?

- ☐ During all or most of the interview (1)
  - ☐ At a number of points during the interview (2)
  - ☐ At one or two points during the interview (3)
  - ☐ Never (4)
- 

9) How motivated was the respondent during the interview?

- ☐ Very motivated (1)
- ☐ Motivated (2)
- ☐ Neither particularly motivated nor unmotivated (3)
- ☐ Unmotivated (4)
- ☐ Very unmotivated (5)

---

### Additional Notes

10) Did anything unusual or interesting happen during this interview? Elaborate on any responses you've given above.

---

---

---

---

---
